# Supplementary material
Source: PubMed Central journal article supplement (PMC2667775)
Supplement: M807994200_1.pdf [file M807994200_1.pdf]

## Supplementary Information

**Supplementary table 1:** Tryptic Peptides Observed by LCMS Eluting from C4 Column between 13 and 16 minutes (Fractions 7 to 12).

| HPLC Fraction | Observed Mass [M](av) <sup>1</sup> | Proposed Structure                               |                                                                         | Calculated Mass [M](av) <sup>2</sup> |
|---------------|------------------------------------|--------------------------------------------------|-------------------------------------------------------------------------|--------------------------------------|
| 7             | <b>9637.0</b>                      | DVSEYSCRELHFTRYVTD<br>GPCRSAKPVTELVCSGQC<br>GPAR | 4 -SS-<br>VQLLCPGGEAPRARKV<br>RLVASCKCKRLTR                             | 9637.096                             |
| 8             | <b>6596.0</b>                      | DVSEYSCRELHFTR -SS-<br>PSGPDFRCIPDRYR            | knot<br>SAKPVTELVCSGQCGP<br>AR -SS- (x2)<br>LVASCKCKRLTR                | 6595.584                             |
|               | 6224.8                             | DVSEYSCRELHFTR -SS-<br>PSGPDFRCIPDRYR            | knot<br>SAKPVTELVCSGQCGP<br>AR -SS- (x2)<br>LVASCKCKR                   | 6225.132                             |
| 9             | <b>10165.4</b>                     | DVSEYSCRELHFTRYVTD<br>GPCRSAKPVTELVCSGQC<br>GPAR | 4 -SS-<br>WWRPSGPDFRCIPDRY<br>RAQRVQLLCPGGEAPR<br>ARKVRLVASCKCKRLT<br>R | 10165.760                            |
|               | 6309.0                             | DVSEYSCRELHFTR -SS-<br>PSGPDFRCIPDRYR            | knot<br>PVTELVCSGQCGPAR -<br>SS- (x2)<br>LVASCKCKRLTR                   | 6309.253                             |
|               | 5938.1                             | DVSEYSCRELHFTR -SS-<br>PSGPDFRCIPDRYR            | knot<br>PVTELVCSGQCGPAR -<br>SS- (x2) LVASCKCKR                         | 5938.801                             |
| 10            | <b>7123.2</b>                      | DVSEYSCRELHFTR -SS-<br>WWRPSGPDFRCIPDRYR         | knot<br>SAKPVTELVCSGQCGP<br>AR -SS- (x2)<br>LVASCKCKRLTR                | 7124.198                             |
| 11            | <b>6753.0</b>                      | DVSEYSCRELHFTR -SS-<br>WWRPSGPDFRCIPDRYR         | knot<br>SAKPVTELVCSGQCGP<br>AR -SS- (x2)<br>LVASCKCKR                   | 6753.746                             |
|               | 6836.9                             | DVSEYSCRELHFTR -SS-<br>WWRPSGPDFRCIPDRYR         | knot<br>PVTELVCSGQCGPAR -<br>SS- (x2)<br>LVASCKCKRLTR                   | 6837.867                             |
| 12            | <b>6468.1</b>                      | DVSEYSCRELHFTR -SS-<br>WWRPSGPDFRCIPDRYR         | knot<br>PVTELVCSGQCGPAR -<br>SS- (x2) LVASCKCKR                         | 6467.415                             |
|               | 2148.0                             | YVTDGPCR                                         | 1 -SS-<br>VQLLCPGGEAPR                                                  | 2147.465                             |

<sup>1</sup> Mass from MaxEnt deconvolution of spectral envelope

<sup>2</sup> Average sequence masses calculated using ExPASy Compute PI/Mw tool  
([http://ca.expasy.org/tools/pi\\_tool.html](http://ca.expasy.org/tools/pi_tool.html))

Bold indicates most intense ion in fraction

**Supplementary table 2:** Tryptic Peptides observed in the C4 fractions by MALDI analysis.

| Fraction No. | Observed mass | Proposed Sequence                   | Position              | Sequence mass |
|--------------|---------------|-------------------------------------|-----------------------|---------------|
| 1            | 521.253       | TMNR                                | 33-36                 | 521.25059     |
| 2            | none          |                                     |                       |               |
| 3            | 1002.52       | FHNQSELK                            | 151-158               | 1002.5009     |
|              | 1673.817      | AENGGRPPHHPFETK                     | 37-51                 | 1673.8148     |
| 4            | 1673.8622     | AENGGRPPHHPFETK                     | 37-51                 | 1673.8148     |
| 5            | 1674.8674     | AENGGRPPHHPFETK *                   | 37-51                 | 1673.8148     |
|              | 866.3982      | GRKPRPR                             | 170-176               | 866.5437      |
| 6            | 1219.5352     | DFGTEAARPQK                         | 159-169               | 1219.6071     |
| 7            | 922.4968      | CIPDRYR                             | 112-118               | 922.4569      |
| 8            | 1741.8022     | DVSEYSCRELHFTR                      | 52-65                 | 1741.7968     |
|              | 1678.8192     | PSGPDFRCIPDRYR                      | 105-118               | 1678.81235    |
|              | 1802.896      | SAKPVTELVCSGQCGR                    | 74-91                 | 1802.8893     |
|              | 1007.5525     | LVASCKCKR                           | 139-147               | 1007.5494     |
| 9            | 1741.8016     | DVSEYSCRELHFTR                      | 52-65                 | 1741.7968     |
| 10           | 853.5282      | LLPNAIGR                            | 92-99                 | 853.526       |
|              | 1741.7983     | DVSEYSCRELHFTR                      | 52-65                 | 1741.7968     |
| 11           | 1035.4959     | GQGWQAFKN                           | 1-9                   | 1035.50118    |
|              | 921.4504      | GQGWQAFK                            | 1-8                   | 921.4583      |
|              | 1057.4802     | GQGWQAFKN + Na <sup>+</sup>         | 1-9                   |               |
|              | 854.5515      | LLPNAIGR *                          | 92-99                 | 853.52593     |
| 12           | 910.4105      | YVTDGPCR                            | 66-73                 | 910.4093      |
|              | 1239.6569     | VQLLCPGGEAPR                        | 122-133               | 1239.652      |
|              | 921.4433      | GQGWQAFK                            | 1-8                   | 921.4583      |
|              | 2147.1208     | YVTDGPCR -ss-<br>VQLLCPGGEAPR       | 66-73 -ss-<br>122-143 | 2147.465      |
| 13           | none          |                                     |                       |               |
| 14           | 1037.532      | GQGWQAFKN * <sup>1</sup>            | 1-9                   | 1035.50118    |
|              | 2594.276      | DATEIPELGEYPEPPPELENNK <sup>1</sup> | 10-32                 | 2594.2513     |

\*Deamidated Asn residues

<sup>1</sup> Unexpected non-tryptic cleavage

## Expression and purification of sclerostin

Uniformly  $^{15}\text{N}$  and  $^{15}\text{N}/^{13}\text{C}$  labelled sclerostin was produced from cells grown in minimal medium containing 1 g/l  $^{15}\text{N}$  ammonium sulphate and if appropriate 2 g/l  $^{13}\text{C}$  D-Glucose as the sole nitrogen and carbon sources. To improve the quality of the  $^{13}\text{C}/^1\text{H}$  HSQC-NOESY spectra,  $^{15}\text{N}/^{13}\text{C}$  labelled samples of sclerostin were prepared that contained unlabelled aromatic residues (Phe, Tyr, Trp and His), which was achieved by the addition of 50 mg/l of the unlabelled amino acids to the minimal medium.

Minimal medium was inoculated at an  $\text{OD}_{600}$  of 0.1 from an overnight culture and grown at  $37^\circ\text{C}$  to an  $\text{OD}_{600}$  of 0.6-0.8 before inducing protein expression with 10  $\mu\text{M}$  IPTG. Induced cultures were grown overnight at  $17^\circ\text{C}$  before cells were harvested by centrifugation. The cell pellet from 6 litres of culture was re-suspended in 100 ml of ice cold PBS with 1 mM EDTA and protease inhibitors (Boehringer). The cells were lysed in a French Press cell disruptor at 20,000 psi, and the soluble fraction clarified by centrifugation at 48,000 g. The volume of the soluble fraction was made up to 1 L with PBS, containing 1 mM EDTA and loaded onto a 100 ml Amylose-HP (New England Biolabs) affinity column and the MBP-Scl step eluted with 10 mM maltose in PBS, containing 1 mM EDTA. Eluted material was diluted 1 in 4 in 25 mM Tris-HCl pH 8.0 and loaded onto a 20 ml Q-HP (GE Healthcare) ion exchange column. The MBP-Scl was eluted with a 0-300 mM NaCl gradient over 20 column volumes. Fractions containing pure MBP-Scl were identified by SDS-PAGE and pooled together. The maltose binding protein was cleaved from sclerostin by addition of TEV protease (~1 mg TEV; 10 mg MBP-Scl) for 5 hours at  $25^\circ\text{C}$ . The cleaved material was diluted 1 in 3 in 25 mM sodium phosphate buffer pH 7.0 and loaded onto a 10 ml SP-HP ion exchange column. Sclerostin was eluted by a 0-1.0 M NaCl gradient over 20 column volumes. Fractions containing pure sclerostin were identified by SDS-PAGE, pooled, concentrated to 0.5 mM and buffer-exchanged into 25 mM sodium phosphate buffer, 100 mM NaCl, 10  $\mu\text{M}$  EDTA, 0.01 % (w/v)  $\text{NaN}_3$ , pH 5.5 for NMR analysis.
